# Supplementary material for: A Neuron-Glial Trans-Signaling Cascade Mediates LRRK2-Induced Neurodegeneration
Source: PubMed Central journal article supplement — Cell Rep. Author manuscript; Available in PMC 2019 Apr 20. (PMC6474846; doi:10.1016/j.celrep.2019.01.077), 2019-02-12
Supplement: NIHMS1521504-supplement-1.pdf [file NIHMS1521504-supplement-1.pdf]

**Cell Reports, Volume 26**

**Supplemental Information**

**A Neuron-Glial Trans-Signaling Cascade  
Mediates LRRK2-Induced Neurodegeneration**

**Elie Maksoud, Edward H. Liao, and A. Pejmun Haghghi**

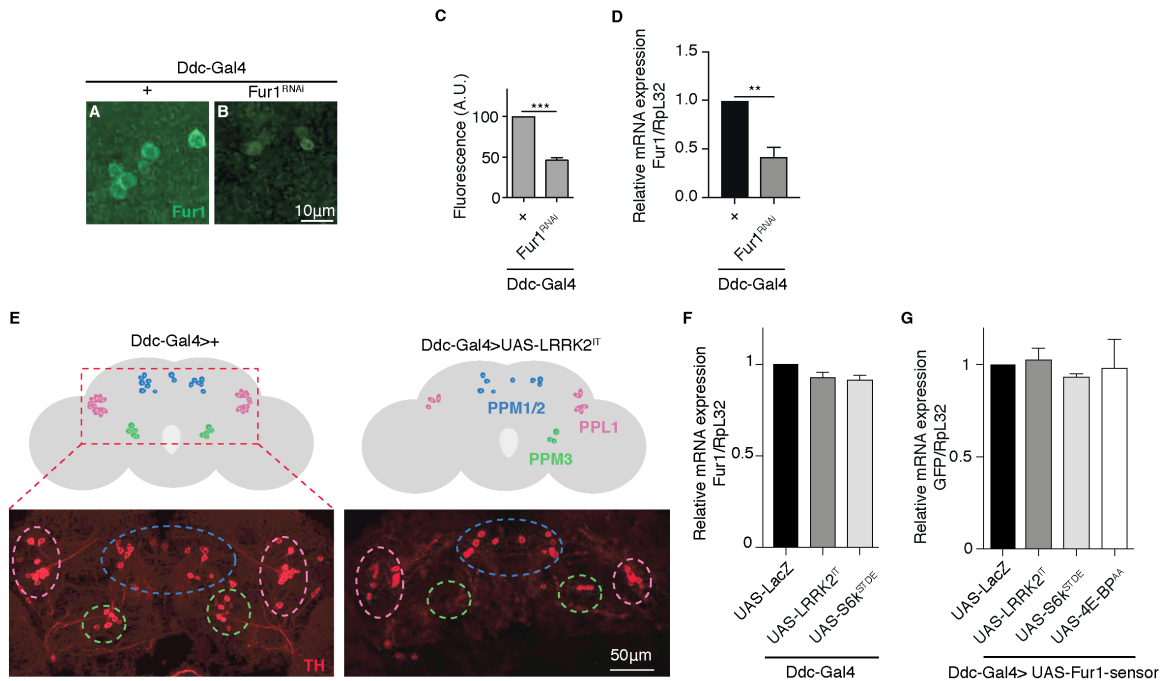

**Figure S1, Related to Figure 1: LRRK2<sup>IT</sup> overexpression in DA neurons doesn't affect Fur1 or Fur1 sensor transcription levels.**

(A-B) Representative images of PPL1 clusters from 10-day-old female brains stained with anti-Fur1 (green) in (A) + (Ddc-Gal4/W1118) and (B) Fur1<sup>RNAi</sup> (Ddc-Gal4/+; UAS-Fur1-RNAi/+).

(C) Quantification of the fluorescence associated with Fur1 antibody from genotypes in A and B in 10-day-old female flies. n=50 neurons from 5 PPL1 clusters for each genotype. Data are represented as mean ± SEM. Student's t-test.

(D) Quantification of Fur1 mRNA expression relative to RpL32 from female fly heads by qPCR for genotypes in A and B. n=3. Data are represented as mean ± SEM. Student's t-test.

(E) Top: Schematic representation of the adult *Drosophila* brain DA neurons clusters PPL1, PPM1/2 and PPM3. Bottom: Dorsal view of the whole mount *Drosophila* brain for the following genotypes: Ddc-Gal4>+ (Ddc-Gal4/UAS-LacZ) and Ddc-Gal4> UAS-LRRK2<sup>IT</sup> (Ddc-Gal4/+; UAS-LRRK2<sup>IT</sup>/+). DA neurons are stained with an anti-TH antibody in red.

(F) Quantification of Fur1 mRNA expression relative to RpL32 by qPCR from female fly heads for the following genotypes: UAS-LacZ (Ddc-Gal4/UAS-LacZ), UAS-LRRK2<sup>IT</sup> (Ddc-Gal4/+; UAS-LRRK2<sup>IT</sup>/+) and UAS-S6K<sup>STDE</sup> (Ddc-Gal4/+; UAS-S6K<sup>STDE</sup>/+). n=3 for each genotype. Data are represented as mean ± SEM. One-way ANOVA with Bonferroni post-test.

(G) Quantification of GFP mRNA expression relative to RpL32 by qPCR from female fly heads for the following genotypes: UAS-LacZ (UAS-Fur1 sensor/UAS-LacZ; Ddc-Gal4/+), UAS-LRRK2<sup>IT</sup> (UAS-Fur1 sensor/+; Ddc-Gal4/UAS-LRRK2<sup>IT</sup>), UAS-S6K<sup>STDE</sup> (UAS-Fur1 sensor/+; Ddc-Gal4/UAS-S6K<sup>STDE</sup>) and

UAS-4E-BP<sup>AA</sup> (UAS-Fur1 sensor/+; Ddc-Gal4/UAS-4E-BP<sup>AA</sup>). n=3 for each genotype. Data are represented as mean  $\pm$  SEM. One-way ANOVA with Bonferroni post-test.  
\*\*  $P < 0.01$ ; \*\*\*  $P < 0.001$ .

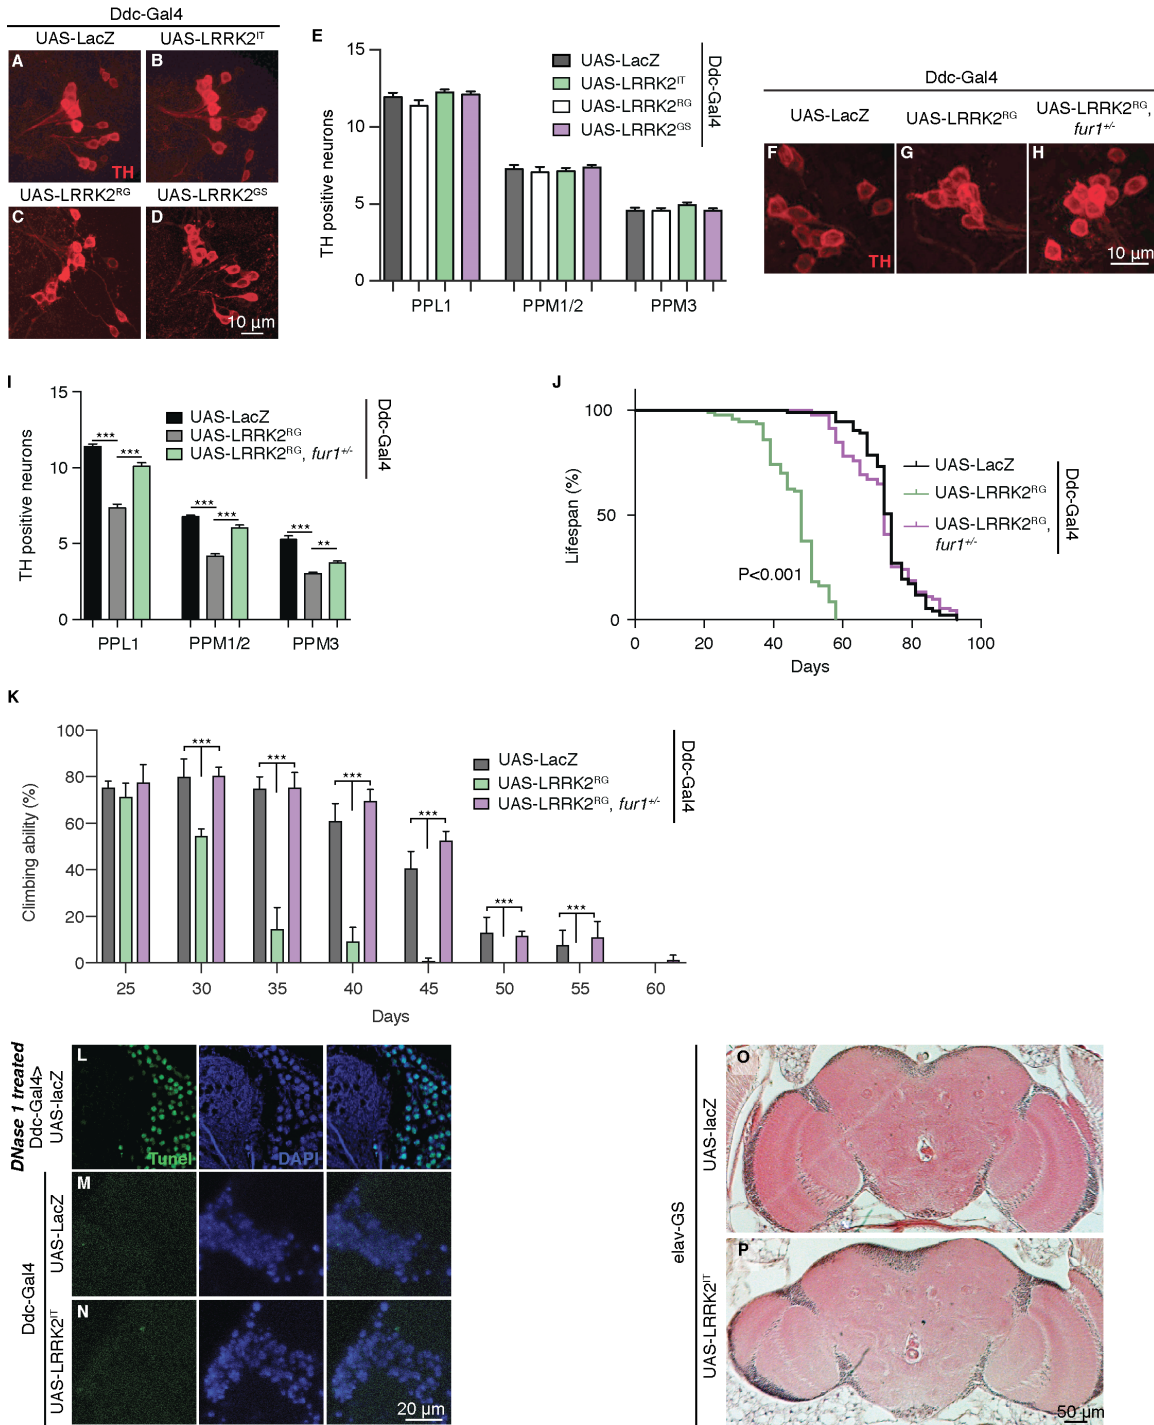

**Figure S2, Related to Figure 2: Fur1 heterozygosity is protective in LRRK2<sup>RG</sup> over-expressing neurons.**

(A-D) Representative images of DA neurons stained with anti-TH antibody (red) from PPL1 clusters in 10-day-old female flies for the following genotypes: (A) UAS-LacZ (Ddc-Gal4/UAS-LacZ), (B) UAS-

LRRK2<sup>IT</sup> (Ddc-Gal4/+; UAS-LRRK2<sup>IT/+</sup>), (C) UAS-LRRK2<sup>RG</sup> (Ddc-Gal4/UAS-LRRK2<sup>RG</sup>) and (D) UAS-LRRK2<sup>GS</sup> (Ddc-Gal4/+; UAS-LRRK2<sup>GS/+</sup>).

(E) Quantification of the number of TH positive DA neurons in the PPL1, PPM1/2 and PPM3 clusters in 10-day-old females for genotypes in A to D. n=22 hemispheres for each genotype. Data are represented as mean ± SEM. One-way ANOVA with Bonferroni post-test.

(F-H) Representative images of DA neurons stained with anti-TH antibody (red) from PPL1 clusters in 60-day-old female flies for the following genotypes: (F) UAS-LacZ (Ddc-Gal4/UAS-LacZ), (G) UAS-LRRK2<sup>RG</sup> (Ddc-Gal4/UAS-LRRK2<sup>RG</sup>) and (H) UAS-LRRK2<sup>RG</sup>, *fur1*<sup>+/-</sup> (Ddc-Gal4/UAS-LRRK2<sup>RG</sup>; *fur1*<sup>rl205/+</sup>).

(I) Quantification of the number of TH positive DA neurons in the PPL1, PPM1/2 and PPM3 clusters in 60-day-old females for genotypes in F to H. n=22 hemispheres for each genotype. Data are represented as mean ± SEM. One-way ANOVA with Bonferroni post-test.

(J-K) Representative survival curves (J) and climbing activity (K) for genotypes in F to H. Survival: n=100 flies for each genotype (See Table S1). Log-rank and Wilcoxon tests. Climbing n=60 flies for each genotype. For climbing activity, data are represented as mean ± SEM. Two-way ANOVA with Dunnett post-test.

(L-N) Representative images of TUNEL (green) and DAPI (blue) staining in 5 μm paraffin sections of 50 day-old *Drosophila* heads: (L) Upper right quadrant at approximately mid-brain of a DNase1 treated section of the following genotype: Ddc-Gal4/UAS-LacZ; (M-N) Upper right quadrant at approximately mid-brain in *Drosophila* of the following genotypes: (M) UAS-LacZ (Ddc-Gal4/UAS-LacZ) and (N) UAS-LRRK2<sup>IT</sup> (Ddc-Gal4/+; UAS-LRRK2<sup>IT/+</sup>).

(O-P) Representative images of 5 μm paraffin sections at approximately midbrain of 50-day-old female fly brains of the following genotypes: (O) UAS-lacZ (elav-GS/UAS-lacZ) and (P) UAS-LRRK2<sup>IT</sup> (elav-GS/+; UAS-LRRK2<sup>IT/+</sup>). \*\*  $P < 0.01$ ; \*\*\*  $P < 0.001$ .

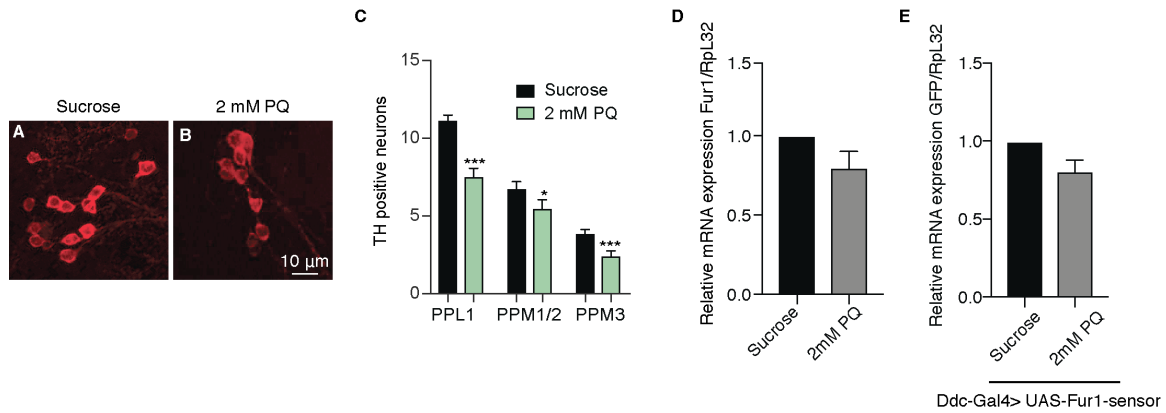

**Figure S3, Related to Figure 3: Paraquat exposure is toxic to DA neurons.**

(A-B) Representative images of DA neurons stained with anti-TH antibody (red) from PPL1 cluster in ( $\gamma w$ ) female flies raised on (A) sucrose or (B) 2 mM paraquat containing media for 5 days.

(C) Quantification of the number of TH positive DA neurons in the PPL1, PPM1/2 and PPM3 clusters for conditions A and B.  $n=22$  hemispheres for each genotype. Student's t-test.

(D) Quantification of Fur1 mRNA expression relative to RpL32 by qPCR from ( $\gamma w$ ) female fly heads raised on sucrose or 2 mM paraquat containing media for 5 days.  $n=3$  for each genotype. Student's t-test.

(E) Quantification of GFP mRNA expression relative to RpL32 by qPCR from female fly heads of (UAS-Fur1 sensor/+; Ddc-Gal4/+) flies raised on sucrose or 2 mM paraquat containing media for 5 days.  $n=3$  for each genotype. Student's t-test

Error bars represent SEM. \*  $P<0.05$ , \*\*\*  $P<0.001$ .

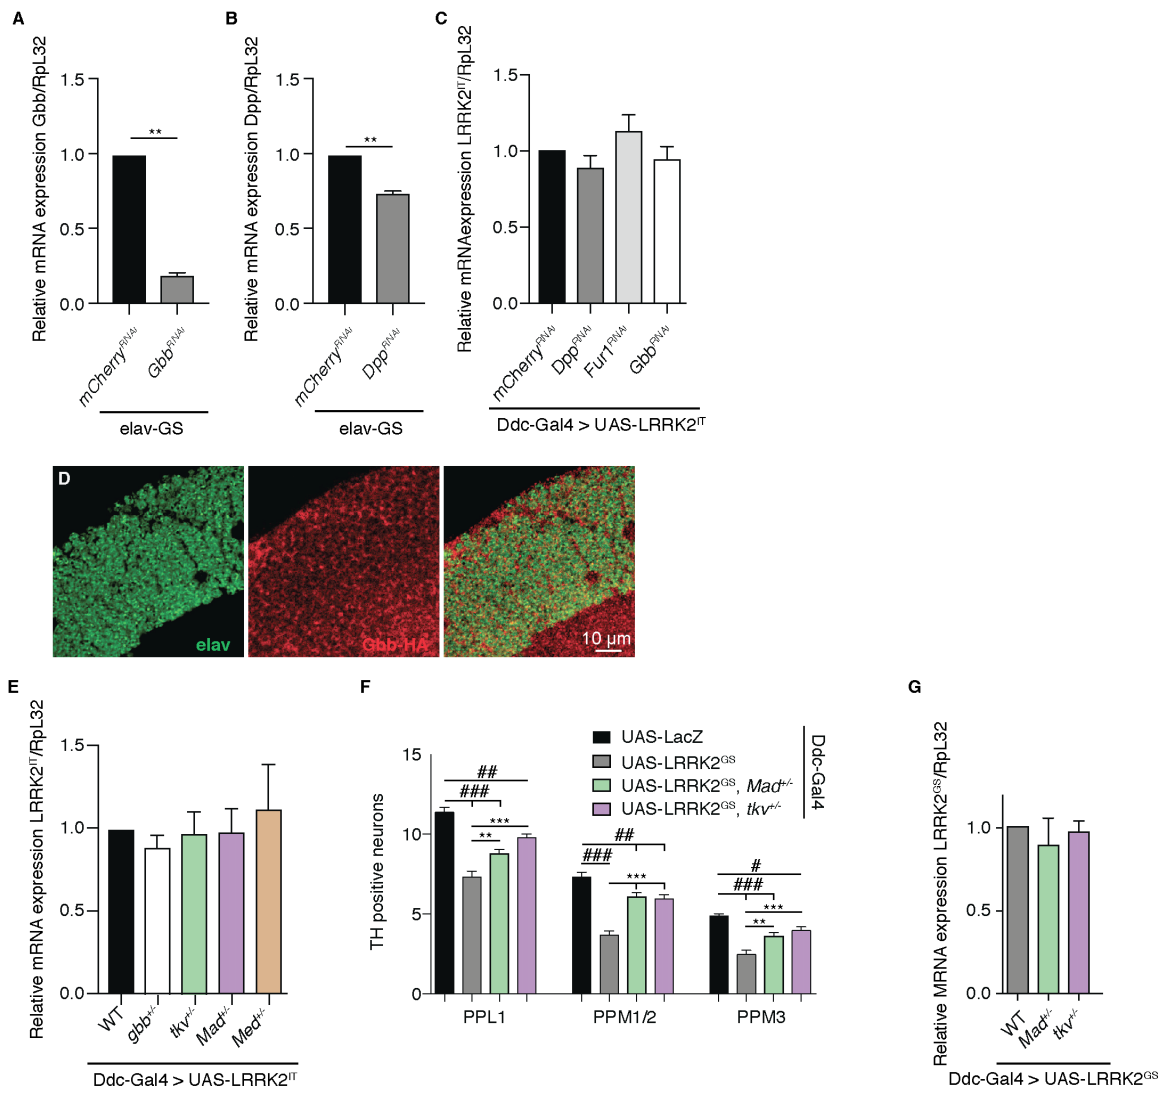

**Figure S4, Related to Figure 4: LRRK2<sup>GS</sup> toxicity is mediated by BMP signaling.**

(A) Quantification of Gbb mRNA expression relative to RpL32 by qPCR from female fly heads of the following genotypes: mCherry<sup>RNAi</sup> (elav-GS/+; UAS-mCherry-RNAi/+) and Gbb<sup>RNAi</sup> (elav-GS/+; UAS-Gbb-RNAi/+). n=3 for each genotype. Student's t-test.

(B) Quantification of Dpp mRNA expression relative to RpL32 by qPCR from female fly heads of genotypes: mCherry<sup>RNAi</sup> (elav-GS/+; UAS-mcherry-RNAi /+) and Dpp<sup>RNAi</sup> (elav-GS/+; UAS-Dpp-RNAi /+). n=3. Student's t-test.

(C) Quantification of LRRK2<sup>IT</sup> mRNA expression relative to RpL32 by qPCR from female fly heads of the following genotypes: mCherry<sup>RNAi</sup> (Ddc-Gal4/+; UAS- LRRK2<sup>IT</sup>/UAS-mCherry-RNAi), Dpp<sup>RNAi</sup> (Ddc-Gal4/+; UAS- LRRK2<sup>IT</sup>/UAS-Dpp-RNAi), Fur1<sup>RNAi</sup> (Ddc-Gal4/+; UAS- LRRK2<sup>IT</sup>/UAS-Fur1-RNAi) and

Gbb<sup>RNAi</sup> (Ddc-Gal4/+; UAS- LRRK2<sup>IT</sup>/UAS-Gbb-RNAi). n=3 for each genotype. One-way ANOVA with Bonferroni post-test.

(D) Representative images of the upper left quadrant of the adult *Drosophila* brain (Gbb-HA) double stained with anti-elav (green) and anti-HA (red).

(E) Quantification of LRRK2<sup>IT</sup> mRNA expression relative to RpL32 by qPCR from female fly heads of the following genotypes: WT (Ddc-Gal4/+; UAS- LRRK2<sup>IT</sup>/+), *gbb*<sup>+/-</sup> (Ddc-Gal4/*gbb*<sup>1</sup>; UAS- LRRK2<sup>IT</sup>/+), *tkv*<sup>+/-</sup> (Ddc-Gal4/*tkv*<sup>7</sup>; UAS- LRRK2<sup>IT</sup>/+), *Mad*<sup>+/-</sup> (Ddc-Gal4/ *Mad*<sup>2371</sup>; UAS- LRRK2<sup>IT</sup>/+) and *Med*<sup>+/-</sup> (Ddc-Gal4/+; UAS- LRRK2<sup>IT</sup>/*Med*<sup>C246</sup>). n=3 for each genotype. One-way ANOVA with Bonferroni post-test.

(F) Quantification of the number of TH positive DA neurons in the PPL1, PPM1/2 and PPM3 clusters of 60-day-old female flies of the following genotypes: UAS-LacZ (Ddc-Gal4/UAS-LacZ), UAS-LRRK2<sup>GS</sup> (Ddc-Gal4/+; UAS-LRRK2<sup>GS</sup>/+), UAS-LRRK2<sup>GS</sup>; *Mad*<sup>+/-</sup> (Ddc-Gal4/*Mad*<sup>K00237</sup>; UAS-LRRK2<sup>GS</sup>/+) and UAS-LRRK2<sup>GS</sup>; *tkv*<sup>+/-</sup> (Ddc-Gal4/*tkv*<sup>7</sup>; UAS- LRRK2<sup>GS</sup>/+). One-way ANOVA with Bonferroni post-test.

(G) Quantification of LRRK2<sup>GS</sup> mRNA expression relative to RpL32 by qPCR from female fly heads of the following genotypes: WT (Ddc-Gal4/+; UAS-LRRK2<sup>GS</sup>/+), UAS-LRRK2<sup>GS</sup>; *Mad*<sup>+/-</sup> (Ddc-Gal4/*Mad*<sup>K00237</sup>; UAS- LRRK2<sup>GS</sup>/+) and UAS-LRRK2<sup>GS</sup>; *tkv*<sup>+/-</sup> (Ddc-Gal4/*tkv*<sup>7</sup>; UAS- LRRK2<sup>GS</sup>/+). One-way ANOVA with Bonferroni post-test.

Error bars represent SEM. \*\*  $P < 0.01$  \*\*\*  $P < 0.001$ ; #  $P < 0.05$ ; ##  $P < 0.01$ ; ###  $P < 0.001$



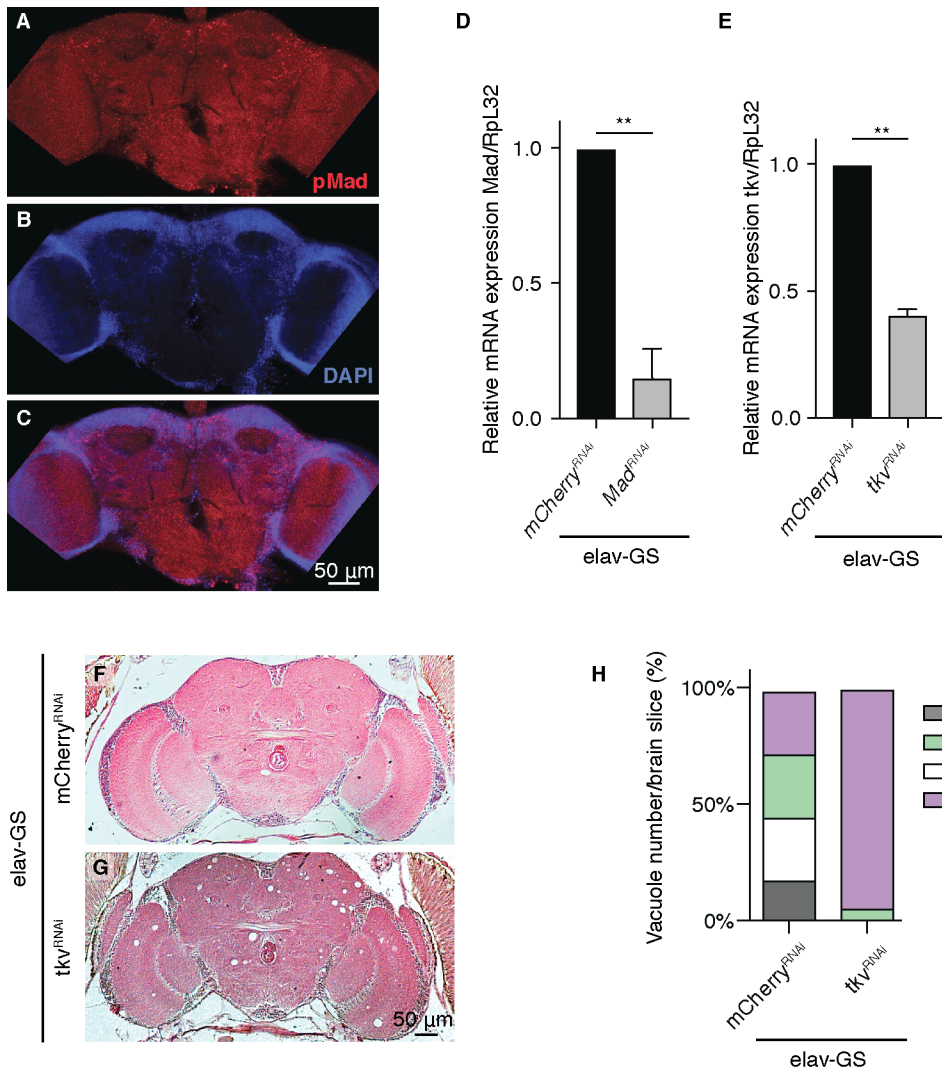

**Figure S5, Related to Figure 5: Loss of BMP signaling in neurons causes neurodegeneration.**

(A-C) Adult *Drosophila* brain double stained for (A) anti-pMad (red) and (B) DAPI (blue) in 10-day-old (*yw*) flies, (C) merged image.

(D) Quantification of Mad mRNA expression relative to RpL32 by qPCR from female fly heads of genotypes: mCherry<sup>RNAi</sup> (elav-GS/+; UAS-mCherry-RNAi/+) and Mad<sup>RNAi</sup> (elav-GS/+; UAS-Mad-RNAi/+). n=3 for each genotype. Student's t-test.

(E) Quantification of tkv mRNA expression relative to RpL32 by qPCR from female fly heads of genotypes: mCherry<sup>RNAi</sup> (elav-GS/+; UAS-mCherry-RNAi/+) and tkv<sup>RNAi</sup> (elav-GS/+; UAS-tkv-RNAi/+). n=3 for each genotype. Student's t-test.

(F-G) Representative images of 5  $\mu$ m paraffin sections at approximately midbrain of 40-day-old female fly brains of the following genotypes: (F) mCherry<sup>RNAi</sup> (elav-GS/+; mCherry-RNAi/+) and (G) tkv<sup>RNAi</sup> (elav-GS/+; tkv-RNAi/+). White vacuoles indicate neurodegeneration.

(H) Percentage of brain sections from independent brains for genotypes S5F and S5G with (0-1), (2-3), (4-5) and (6+) vacuoles per section. n=20 sections from 20 brains for each genotype. Error bars represent SEM. \*\*  $P < 0.01$

| Figure: | Genotypes                                                                     | Median survival (days) |     |     |
|---------|-------------------------------------------------------------------------------|------------------------|-----|-----|
|         |                                                                               | N1                     | N2  | N3  |
| 2F      | Ddc-Gal4/UAS-LacZ                                                             | 57                     | 63  | 65  |
|         | Ddc-Gal4/+; <i>fur1<sup>rl205</sup>/+</i>                                     | 60                     | 65  | 62  |
|         | Ddc-Gal4/+; UAS-LRRK2 <sup>IT</sup> /+                                        | 34                     | 31  | 38  |
|         | Ddc-Gal4/+; UAS- LRRK2 <sup>IT</sup> / <i>fur1<sup>rl205</sup></i> )          | 55                     | 57  | 57  |
| 3D      | Ddc-Gal4/+; UAS-eGFP/+                                                        | 60                     | 58  | 62  |
|         | Ddc-Gal4/UAS-eGFP:: <i>Fur1</i>                                               | 39                     | 35  | 44  |
| 3K      | Ddc-Gal4/+ ( <i>w<sup>1118</sup></i> )                                        | 5.5                    | 6   | 5   |
|         | Ddc-Gal4/+; UAS- <i>Fur1</i> -RNAi                                            | 8                      | 9   | 8.5 |
| 3J      | Ddc-Gal4/+; UAS-eGFP/+                                                        | 5.5                    | 6   | 5   |
|         | Ddc-Gal4/UAS-eGFP:: <i>Fur1</i>                                               | 8                      | 9   | 8.5 |
| 5E      | <i>elavGS</i> /+; UAS- <i>mCherry</i> -RNAi/+                                 | 8.5                    | 9   | 8   |
|         | <i>elavGS</i> /+; UAS- <i>tkv</i> -RNAi/+                                     | 4.5                    | 5   | 4.5 |
|         | <i>elavGS</i> /+; UAS- <i>Mad</i> -RNAi/+                                     | 4                      | 5.5 | 4.5 |
| 5F      | <i>tub-Gal80<sup>ts</sup></i> /+; <i>repo-Gal4</i> /UAS- <i>mCherry</i> -RNAi | 9                      | 8.5 | 8   |
|         | <i>tub-Gal80<sup>ts</sup></i> /+; <i>repo-Gal4</i> /UAS- <i>tkv</i> -RNAi     | 10                     | 9.5 | 10  |
|         | <i>tub-Gal80<sup>ts</sup></i> /+; <i>repo-Gal4</i> /UAS- <i>Mad</i> -RNAi     | 10                     | 10  | 9.5 |
| S2J     | Ddc-Gal4/UAS-LacZ                                                             | 74                     | 67  | 72  |
|         | Ddc-Gal4/UAS-LRRK <sup>RG</sup>                                               | 48                     | 53  | 50  |
|         | Ddc-Gal4/UAS- LRRK <sup>RG</sup> ; <i>fur1<sup>rl205</sup>/+</i>              | 72                     | 65  | 68  |

**Table S1, Related to Figures 2, 3, 5 and S2: Median lifespan of three repeats (N) for each experiment.** Summary of median lifespan in days of three repeats for experiments from Fig 2F, 3D, 3K, 3L, 5E, 5F and S2E. N refers to a single experiment based on an independent set of genetic crosses. n= 100 female flies for each genotype.

| Primers        |                                         |
|----------------|-----------------------------------------|
| Furin1 forward | AGGAATATGCAGCAGGTGGG                    |
| Furin1 reverse | TGCACTTAAGCACTTGCGA                     |
| GFP forward    | GGGCTTGGATGTTTTAATCTTG                  |
| GFP reverse    | AGAAGAAGCCCCGCTTGTA                     |
| tkv forward    | ATGGAACCTGCGAGACCAGAC                   |
| tkv reverse    | CTCCTCGTACATCCCGGT                      |
| Mad forward    | GCACATTTGCGTGTGCGAA                     |
| Mad reverse    | GCGGATAGTGCCTGGATTTAG                   |
| Gbb forward    | GAGTGGCTGGTCAAGTCGAA                    |
| Gbb reverse    | GAAGCCGATCATGAAGGGCT                    |
| Dpp forward    | TGGCGACTTTTCAAACGATTGT                  |
| Dpp reverse    | CAGCGGAATATGAGCGGCAA                    |
| RpL32 forward  | AAGCGGCGACGCACTCTGTT                    |
| RpL32 reverse  | GCCCAGCATACAGGCCAAAG                    |
| LRRK2 forward  | CGATCCATGGCTAGTGGCAGCTGT                |
| LRRK2 reverse  | CCTCTGAGACTCTCTCAAACAGC                 |
| OED461         | GCACCGGTATATGAAAAACGACGTCGTGCGAT        |
| OED462         | GAGCGGCCGCTTATCTAATGCATTTGATAATGTTGTTTT |

**Table S2, Related to figures S1, S3, S4 and S5 and Key Resources Table: Primers' list.**
